# Supplementary material for: Gestational Weight Gain and Fetal-Maternal Adiponectin, Leptin, and CRP: results of two birth cohorts studies
Source: PubMed Central journal article supplement (PMC5288774; doi:10.1038/srep41847), 2017-02-02
Supplement: srep41847-s1.pdf [file srep41847-s1.pdf]

**Gestational Weight Gain and Fetal-Maternal Adiponectin, Leptin, and CRP: results of two birth cohorts studies**

Chad A. Logan<sup>1</sup>, Rebecca Bornemann<sup>1</sup>, Wolfgang Koenig<sup>2</sup>, Frank Reister<sup>3</sup>, Viola Walter<sup>4</sup>, Giamila Fantuzzi<sup>5</sup>, Maria Weyermann<sup>6</sup>, Hermann Brenner<sup>4</sup>, Jon Genuneit<sup>1,7</sup>, Dietrich Rothenbacher<sup>1\*</sup>

**Affiliations:**

1 Institute of Epidemiology and Medical Biometry, Ulm University, Ulm, Germany

2 Department of Internal Medicine II - Cardiology, University Medical Center Ulm, Germany

3 Department of Gynecology and Obstetrics, University Medical Center Ulm, Germany

4 Division of Clinical Epidemiology and Aging Research, German Cancer Research Center (DKFZ), Heidelberg, Germany

5 Department of Kinesiology and Nutrition, University of Illinois at Chicago, Chicago, IL, USA

6 Faculty of Health Care Krefeld, Niederrhein University of Applied Sciences, Krefeld, Germany

7 Member of 'In-FLAME' the International Inflammation Network, World Universities Network (WUN)

**Address correspondence to:** Prof. Dr. med. Dietrich Rothenbacher, MPH, Institute of Epidemiology and Medical Biometry, Ulm University, Helmholtzstr. 22, D-89081 Ulm, Germany [dietrich.rothenbacher@uni-ulm.de], phone: 0049 731 500 31060, fax: 0049 731 500 31069

**Supplement figure 1: Flow chart of the study population restrictions**

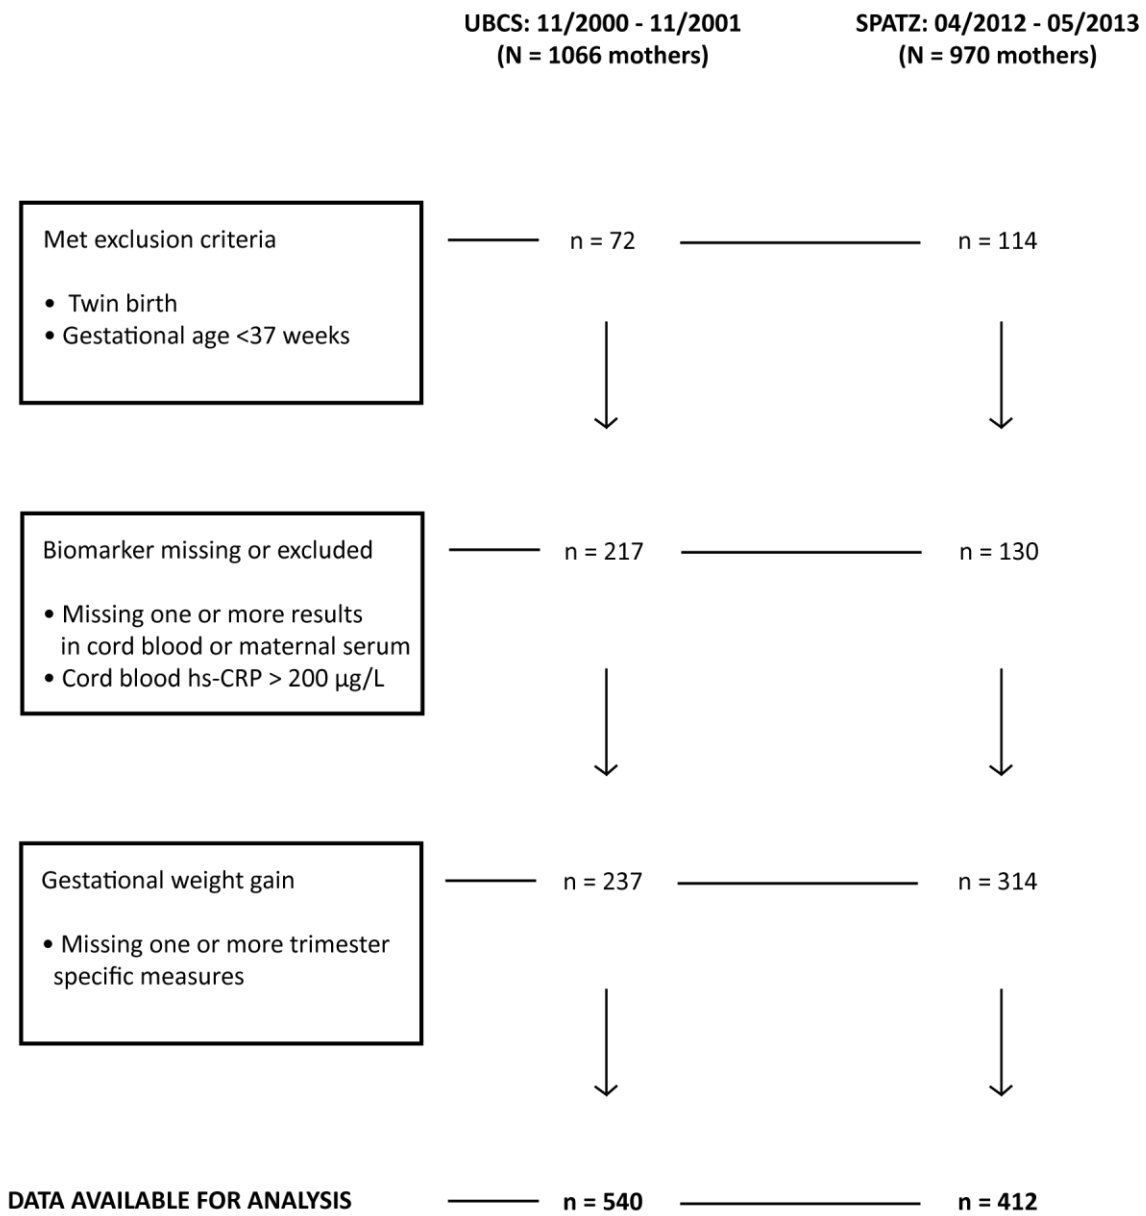

**Supplement Table 1: Comparison of UBCS full cohort to final analysis subpopulation †**

|                                                             | Total Population (N = 1090) |       |                | Subpopulation (n = 589) |       |                |
|-------------------------------------------------------------|-----------------------------|-------|----------------|-------------------------|-------|----------------|
| <b>MATERNAL FACTORS</b>                                     |                             |       |                |                         |       |                |
| Maternal age (years)                                        | 1087                        | 31.0  | (30.7; 31.3)   | 539                     | 31.0  | (30.6; 31.4)   |
| <b>Maternal education</b>                                   |                             |       |                |                         |       |                |
| ≥12 years education                                         | 398                         | 36.5% | (33.7%; 39.4%) | 192                     | 35.6% | (31.5%; 39.6%) |
| <12 years education                                         | 662                         | 60.7% | (57.8%; 63.6%) | 337                     | 62.4% | (58.3%; 66.5%) |
| Missing                                                     | 30                          | 2.8%  | (1.8%; 3.7%)   | 11                      | 2.0%  | (0.8%; 3.2%)   |
| <b>Parity</b>                                               |                             |       |                |                         |       |                |
| First parity                                                | 541                         | 49.6% | (46.7%; 52.6%) | 276                     | 51.1% | (46.9%; 55.3%) |
| Second or higher                                            | 540                         | 49.5% | (46.6%; 52.5%) | 260                     | 48.1% | (43.9%; 52.4%) |
| Missing                                                     | 9                           | 0.8%  | (0.3%; 1.4%)   | 4                       | 0.7%  | (0.0%; 1.5%)   |
| <b>Smoking history (within 1 year before delivery)</b>      |                             |       |                |                         |       |                |
| No                                                          | 740                         | 67.9% | (65.1%; 70.7%) | 361                     | 66.9% | (62.9%; 70.8%) |
| Yes                                                         | 347                         | 31.8% | (29.1%; 34.6%) | 179                     | 33.1% | (29.2%; 37.1%) |
| Missing                                                     | 3                           | 0.3%  | (0.0%; 0.6%)   | .                       | .     | .              |
| <b>Maternal pre-pregnancy BMI category</b>                  |                             |       |                |                         |       |                |
| Underweight (BMI <18.5)                                     | 39                          | 3.6%  | (2.5%; 4.7%)   | 17                      | 3.1%  | (1.7%; 4.6%)   |
| Normal (18.5 ≤BMI <25.0)                                    | 725                         | 66.5% | (63.7%; 69.3%) | 364                     | 67.4% | (63.5%; 71.4%) |
| Overweight (25.0 ≤BMI <30.0)                                | 227                         | 20.8% | (18.4%; 23.2%) | 120                     | 22.2% | (18.7%; 25.7%) |
| Obese (BMI ≥30.0)                                           | 86                          | 7.9%  | (6.3%; 9.5%)   | 38                      | 7.0%  | (4.9%; 9.2%)   |
| Missing                                                     | 13                          | 1.2%  | (0.5%; 1.8%)   | 1                       | 0.2%  | (0.0%; 0.5%)   |
| <b>PREGNANCY AND BIRTH</b>                                  |                             |       |                |                         |       |                |
| <b>Gender</b>                                               |                             |       |                |                         |       |                |
| Male                                                        | 551                         | 50.6% | (47.6%; 53.5%) | 280                     | 51.9% | (47.6%; 56.1%) |
| Female                                                      | 537                         | 49.3% | (46.3%; 52.2%) | 260                     | 48.1% | (43.9%; 52.4%) |
| Missing                                                     | 2                           | 0.2%  | (0.0%; 0.4%)   | .                       | .     | .              |
| Birth weight (g)                                            | 1084                        | 3379  | (3351; 3407)   | 540                     | 3447  | (3410; 3484)   |
| <b>Delivery mode</b>                                        |                             |       |                |                         |       |                |
| Vaginal spontaneous                                         | 854                         | 78.3% | (75.9%; 80.8%) | 448                     | 83.0% | (79.8%; 86.1%) |
| Elective cesarean                                           | 65                          | 6.0%  | (4.6%; 7.4%)   | 23                      | 4.3%  | (2.6%; 6.0%)   |
| Emergency cesarean                                          | 126                         | 11.6% | (9.7%; 13.5%)  | 48                      | 8.9%  | (6.5%; 11.3%)  |
| Vaginal assisted                                            | 45                          | 4.1%  | (2.9%; 5.3%)   | 21                      | 3.9%  | (2.3%; 5.5%)   |
| Duration of labor (hours)                                   | 1049                        | 8.4   | (8.0; 8.7)     | 533                     | 8.5   | (8.0; 9.0)     |
| <b>GESTATIONAL AGE AT GESTATIONAL WEIGHT MEASURE (days)</b> |                             |       |                |                         |       |                |
| Beginning of trimester 2                                    | 930                         | 84    | (83.5; 84)     | 540                     | 84.6  | (84; 85)       |
| Beginning of trimester 3                                    | 1000                        | 190   | (190; 191)     | 540                     | 190   | (190; 191)     |
| Last measure                                                | 927                         | 271   | (270; 272)     | 540                     | 274   | (273; 275)     |
| <b>GESTATIONAL WEIGHT GAIN (kg)</b>                         |                             |       |                |                         |       |                |
| Trimester 1                                                 | 930                         | 1.9   | (1.8; 2.1)     | 540                     | 2.0   | (1.8; 2.3)     |
| Trimester 2                                                 | 873                         | 7.4   | (7.2; 7.6)     | 540                     | 7.4   | (7.2; 7.6)     |
| Trimester 3                                                 | 864                         | 5.8   | (5.6; 6.0)     | 540                     | 5.9   | (5.7; 6.1)     |
| Total                                                       | 921                         | 14.9  | (14.5; 15.2)   | 540                     | 15.3  | (14.9; 15.8)   |
| <b>WEIGHT GAIN CATEGORY (IOM, 2009)</b>                     |                             |       |                |                         |       |                |
| Low                                                         | 177                         | 16.2% | (14.0%; 18.4%) | 85                      | 15.7% | (12.7%; 18.8%) |
| Normal                                                      | 294                         | 27.0% | (24.3%; 29.6%) | 175                     | 32.4% | (28.5%; 36.4%) |
| Excessive                                                   | 448                         | 41.1% | (38.2%; 44.0%) | 279                     | 51.7% | (47.5%; 55.9%) |
| Missing                                                     | 171                         | 15.7% | (13.5%; 17.8%) | 1                       | 0.2%  | (0.0%; 0.5%)   |
| <b>CORD BLOOD MARKERS</b>                                   |                             |       |                |                         |       |                |

|                                             |      |       |               |     |      |              |
|---------------------------------------------|------|-------|---------------|-----|------|--------------|
| Adiponectin (mg/l)                          | 1008 | 31.7  | (30.9; 32.6)  | 540 | 32.6 | (31.4; 33.8) |
| Leptin (µg/l)                               | 1007 | 10.9  | (10.1; 11.7)  | 540 | 11.1 | (10.1; 12.2) |
| hs-CRP (µg/l)                               | 974  | 129.9 | (43.6; 216.2) | 540 | 50.1 | (47.2; 52.9) |
| <b>POST-DELIVERY MATERNAL SERUM MARKERS</b> |      |       |               |     |      |              |
| Adiponectin (mg/l)                          | 1016 | 9.0   | (8.7; 9.3)    | 540 | 9.3  | (8.9; 9.7)   |
| Leptin (µg/l)                               | 1013 | 20.0  | (18.6; 21.3)  | 540 | 21.1 | (19.3; 22.8) |
| hs-CRP (mg/l)                               | 993  | 72.1  | (68.2; 75.9)  | 540 | 69.7 | (64.5; 74.8) |

† Statistics expressed as n and column percentage for categorical variables or median (25<sup>th</sup> percentile; 75<sup>th</sup> percentile) for continuous variables

\* Column values may not always add up to total due to missing values for some variables

\*\* p-value calculated as either  $\chi^2$  or fisher's exact for categorical variables or Kruskal-Wallis for continuous variables

**Supplement Table 2: Comparison of SPATZ full cohort to final analysis subpopulation †**

|                                                             | Total Population (N = 1006) |       |                | Subpopulation (n = 412) |       |                |
|-------------------------------------------------------------|-----------------------------|-------|----------------|-------------------------|-------|----------------|
| <b>MATERNAL FACTORS</b>                                     |                             |       |                |                         |       |                |
| <b>Maternal age (years)</b>                                 | 1006                        | 32.7  | (32.4; 33.0)   | 412                     | 32.8  | (32.4; 33.3)   |
| <b>Maternal education</b>                                   |                             |       |                |                         |       |                |
| ≥12 years education                                         | 577                         | 57.4% | (54.3%; 60.4%) | 250                     | 60.7% | (56.0%; 65.4%) |
| <12 years education                                         | 410                         | 40.8% | (37.7%; 43.8%) | 155                     | 37.6% | (32.9%; 42.3%) |
| Missing                                                     | 19                          | 1.9%  | (1.0%; 2.7%)   | 7                       | 1.7%  | (0.5%; 2.9%)   |
| <b>Parity</b>                                               |                             |       |                |                         |       |                |
| First parity                                                | 547                         | 54.4% | (51.3%; 57.5%) | 227                     | 55.1% | (50.3%; 59.9%) |
| Second or higher                                            | 458                         | 45.5% | (42.4%; 48.6%) | 185                     | 44.9% | (40.1%; 49.7%) |
| Missing                                                     | 1                           | 0.1%  | (0.0%; 0.3%)   | .                       | .     | .              |
| <b>Smoking history (within 1 year before delivery)</b>      |                             |       |                |                         |       |                |
| No                                                          | 730                         | 72.6% | (69.8%; 75.3%) | 307                     | 74.5% | (70.3%; 78.7%) |
| Yes                                                         | 265                         | 26.3% | (23.6%; 29.1%) | 100                     | 24.3% | (20.1%; 28.4%) |
| Missing                                                     | 11                          | 1.1%  | (0.5%; 1.7%)   | 5                       | 1.2%  | (0.2%; 2.3%)   |
| <b>Maternal pre-pregnancy BMI category</b>                  |                             |       |                |                         |       |                |
| Underweight (BMI <18.5)                                     | 27                          | 2.7%  | (1.7%; 3.7%)   | 12                      | 2.9%  | (1.3%; 4.5%)   |
| Normal (18.5 ≤BMI <25.0)                                    | 599                         | 59.5% | (56.5%; 62.6%) | 257                     | 62.4% | (57.7%; 67.1%) |
| Overweight (25.0 ≤BMI <30.0)                                | 225                         | 22.4% | (19.8%; 24.9%) | 91                      | 22.1% | (18.1%; 26.1%) |
| Obese (BMI ≥30.0)                                           | 124                         | 12.3% | (10.3%; 14.4%) | 50                      | 12.1% | (9.0%; 15.3%)  |
| Missing                                                     | 31                          | 3.1%  | (2.0%; 4.1%)   | 2                       | 0.5%  | (0.0%; 1.2%)   |
| <b>PREGNANCY AND BIRTH</b>                                  |                             |       |                |                         |       |                |
| <b>Gender</b>                                               |                             |       |                |                         |       |                |
| Male                                                        | 523                         | 52.0% | (48.9%; 55.1%) | 226                     | 54.9% | (50.0%; 59.7%) |
| Female                                                      | 483                         | 48.0% | (44.9%; 51.1%) | 186                     | 45.1% | (40.3%; 50.0%) |
| <b>Birth weight (g)</b>                                     | 1005                        | 3278  | (3245; 3311)   | 412                     | 3438  | (3395; 3481)   |
| <b>Delivery mode</b>                                        |                             |       |                |                         |       |                |
| Vaginal spontaneous                                         | 639                         | 63.5% | (60.5%; 66.5%) | 274                     | 66.5% | (61.9%; 71.1%) |
| Elective cesarean                                           | 125                         | 12.4% | (10.4%; 14.5%) | 53                      | 12.9% | (9.6%; 16.1%)  |
| Emergency cesarean                                          | 156                         | 15.5% | (13.3%; 17.7%) | 42                      | 10.2% | (7.3%; 13.1%)  |
| Vaginal assisted                                            | 85                          | 8.4%  | (6.7%; 10.2%)  | 43                      | 10.4% | (7.5%; 13.4%)  |
| Missing                                                     | 1                           | 0.1%  | (0.0%; 0.3%)   | .                       | .     | .              |
| <b>Duration of labor (hours)</b>                            | 952                         | 7.6   | (7.2; 8.0)     | 400                     | 7.9   | (7.3; 8.5)     |
| <b>GESTATIONAL AGE AT GESTATIONAL WEIGHT MEASURE (days)</b> |                             |       |                |                         |       |                |
| Beginning of trimester 2                                    | 906                         | 86    | (85; 88)       | 412                     | 84    | (84; 85)       |
| Beginning of trimester 3                                    | 906                         | 191   | (190; 192)     | 412                     | 190   | (189; 190)     |
| Last measure                                                | 906                         | 268   | (267; 269)     | 412                     | 273   | (272; 273)     |
| <b>GESTATIONAL WEIGHT GAIN (kg)</b>                         |                             |       |                |                         |       |                |
| Trimester 1                                                 | 597                         | 1.8   | (1.7; 2.0)     | 412                     | 1.9   | (1.7; 2.2)     |
| Trimester 2                                                 | 788                         | 7.1   | (6.9; 7.3)     | 412                     | 7.0   | (6.8; 7.3)     |
| Trimester 3                                                 | 776                         | 5.5   | (5.3; 5.7)     | 412                     | 5.7   | (5.4; 6.0)     |
| Total                                                       | 536                         | 14.5  | (14.0; 15.0)   | 412                     | 14.7  | (14.2; 15.3)   |
| <b>WEIGHT GAIN CATEGORY (IOM, 2009)</b>                     |                             |       |                |                         |       |                |
| Low                                                         | 87                          | 8.6%  | (6.9%; 10.4%)  | 66                      | 16.0% | (12.5%; 19.6%) |
| Normal                                                      | 190                         | 18.9% | (16.5%; 21.3%) | 145                     | 35.2% | (30.6%; 39.8%) |
| Excessive                                                   | 256                         | 25.4% | (22.8%; 28.1%) | 199                     | 48.3% | (43.5%; 53.1%) |
| Missing                                                     | 473                         | 47.0% | (43.9%; 50.1%) | 2                       | 0.5%  | (0.0%; 1.2%)   |

|                                             |     |       |               |     |      |              |
|---------------------------------------------|-----|-------|---------------|-----|------|--------------|
| <b>CORD BLOOD MARKERS</b>                   |     |       |               |     |      |              |
| Adiponectin (mg/l)                          | 891 | 30.5  | (29.7; 31.3)  | 412 | 31.3 | (30.1; 32.5) |
| Leptin (µg/l)                               | 891 | 10.3  | (8.6; 11.9)   | 412 | 10.0 | (9.2; 10.8)  |
| hs-CRP (µg/l)                               | 891 | 53.9  | (46.1; 61.6)  | 412 | 37.5 | (35.1; 39.9) |
| <b>POST-DELIVERY MATERNAL SERUM MARKERS</b> |     |       |               |     |      |              |
| Adiponectin (mg/l)                          | 956 | 6.1   | (5.9; 6.3)    | 412 | 6.3  | (6.0; 6.6)   |
| Leptin (µg/l)                               | 956 | 18.3  | (17.2; 19.3)  | 412 | 18.7 | (17.1; 20.3) |
| hs-CRP (mg/l)                               | 954 | 258.1 | (20.1; 496.1) | 412 | 81.0 | (74.8; 87.1) |

† Statistics expressed as n and column percentage for categorical variables or median (25<sup>th</sup> percentile; 75<sup>th</sup> percentile) for continuous variables

\* Column values may not always add up to total due to missing values for some variables

\*\* p-value calculated as either  $\chi^2$  or fisher's exact for categorical variables or Kruskal-Wallis for continuous variables

**Supplement table 3: Spearman correlation coefficients cord and maternal serum biomarkers and birth weight**

|                                     |       | <b>Adiponectin<br/>(maternal<br/>serum)</b> | <b>Leptin<br/>(maternal<br/>serum)</b> | <b>hs-CRP<br/>(maternal<br/>serum)</b> | <b>Birth weight</b> |
|-------------------------------------|-------|---------------------------------------------|----------------------------------------|----------------------------------------|---------------------|
| <b>Adiponectin<br/>(cord blood)</b> | UBCS  | 0.11**                                      | 0.11*                                  | -0.03                                  | 0.09*               |
|                                     | SPATZ | 0.18***                                     | 0.00                                   | 0.05                                   | 0.10*               |
| <b>Leptin<br/>(cord blood)</b>      | UBCS  | -0.08                                       | 0.11*                                  | 0.11**                                 | 0.39***             |
|                                     | SPATZ | -0.20***                                    | 0.22***                                | 0.13**                                 | 0.47***             |
| <b>hs-CRP<br/>(cord blood)</b>      | UBCS  | -0.07                                       | 0.11**                                 | 0.34***                                | 0.05                |
|                                     | SPATZ | -0.19***                                    | 0.25***                                | 0.33***                                | 0.03                |
| <b>Birth weight</b>                 | UBCS  | -0.06                                       | -0.06                                  | 0.02                                   | 1.00                |
|                                     | SPATZ | -0.03                                       | -0.01                                  | 0.08                                   | 1.00                |

UBCS subjects were recruited from 11/2000-11/2001; SPATZ subjects were recruited from 04/2012-05/2013

\*Asterisks indicate p-value significance (\*) < 0.05; (\*\*) < 0.01; (\*\*\*) < 0.001
